# Supplementary material for: A metallic Cu2N monolayer with planar tetracoordinated nitrogen as a promising catalyst for CO2 electroreduction
Source: Royal Society of Chemistry journal article supplement (doi:10.1039/d1ta09209j), 2021-12-16
Supplement: d1ta09209j1.pdf [file d1ta09209j1.pdf]

## Electronic Supporting Information

### **Metallic Cu<sub>2</sub>N monolayer with planar tetracoordinated nitrogen as a promising catalyst for CO<sub>2</sub> electroreduction**

Jingjing Jia,<sup>a</sup> Zhongxu Wang,<sup>a</sup> Yu Li,<sup>b</sup> Fengyu Li,<sup>b,\*</sup> Yongchen Shang,<sup>a</sup> Yuejie Liu,<sup>c,\*</sup>

Qinghai Cai,<sup>a,d</sup> Jingxiang Zhao<sup>a,\*</sup>

<sup>a</sup> *College of Chemistry and Chemical Engineering, and Key Laboratory of Photonic and Electronic Bandgap Materials, the Ministry of Education, Harbin Normal University, Harbin, 150025, China*

<sup>b</sup> *School of Physical Science and Technology, Inner Mongolia University, Hohhot, 010021, China*

<sup>c</sup> *Modern Experiment Center, Harbin Normal University, Harbin, 150025, China*

<sup>d</sup> *Heilongjiang Province Collaborative Innovation Center of Cold Region Ecological Safety, Harbin 150025, China*

\* To whom correspondence should be addressed. Email: [fengyuli@imu.edu.cn](mailto:fengyuli@imu.edu.cn) (FL);

[zjx1103@hotmail.com](mailto:zjx1103@hotmail.com) (YL) and [xjz\\_hmily@163.com](mailto:xjz_hmily@163.com) (JZ)

## Computational Details on Free Energy Profiles and Dissolution Potential

On the basis of the CHE model, the  $\Delta G$  value of each elementary step in the CO<sub>2</sub>RR can be obtained by  $\Delta G = \Delta E + \Delta E_{ZPE} - T\Delta S + \Delta G_{pH} + \Delta G_U$ , where the reaction energy difference ( $\Delta E$ ) can be directly computed from DFT computations.  $\Delta E_{ZPE}$  and  $\Delta S$  are the changes in the zero-point energies and entropy between the products and the reactants at room temperature ( $T = 298.15$  K), which can be calculated from the vibrational frequencies, while the entropies of the free molecules, including CO<sub>2</sub>, CH<sub>4</sub>, C<sub>2</sub>H<sub>4</sub>, CO and H<sub>2</sub>, were taken from the NIST database.  $\Delta G_{pH}$  is the free energy correction of pH, which can be calculated by  $\Delta G_{pH} = k_B T \times \text{pH} \times \ln 10$ , and the pH value was set to be zero in this work.  $\Delta G_U = -eU$ , where  $e$  is the transferred charge and  $U$  represents the applied potential at the electrode. The limiting potential ( $U_L$ ) was used to evaluate the Cu<sub>2</sub>N towards the CO<sub>2</sub>RR, which will be obtained from the free energy change of the potential-determining step ( $\Delta G_{PDS}$ ) along the lowest energy pathway:  $U_L = -\Delta G_{\max}/e$ , and a less negative  $U_L$  value denotes less energy input, thus suggesting better catalytic performance.

To evaluate the stability of Cu<sub>2</sub>N monolayer in strong acidic media, we computed the dissolution potentials ( $U_{\text{dis}}$ , in V) of Cu in Cu<sub>2</sub>N monolayer at pH = 0, which was defined as:  $U_{\text{dis}} = U_{\text{Cu}}^0 + \left[ E_{\text{Cu,bulk}} - (E_{\text{Cu}_2\text{N}} - E_{d-\text{Cu}_2\text{N}}) \right] / ne$ , where  $U_{\text{Cu}}^0$  is the standard dissolution potential of Cu in the bulk form (1.21 V),  $d-\text{Cu}_2\text{N}$  is the defective Cu monolayer by dissolving (removing) one Cu to solutions, and  $n$  is the coefficient for the aqueous dissolution reaction:  $\text{Cu} + 2\text{H}^+ \leftrightarrow \text{Cu}^{2+} + \text{H}_2$ , namely,  $n$

equals to 2. According to this definition, the  $U_{\text{dis}}$  value of Cu in  $\text{Cu}_2\text{N}$  monolayer is computed to be about 1.01 V.

**Table S1.** Elastic constants ( $C_{11}$ ,  $C_{22}$ ,  $C_{12}$ ,  $C_{44}$ , in  $\text{N m}^{-1}$ ) of the  $\text{Cu}_2\text{N}$  monolayer.

| System                | $C_{11}$ | $C_{22}$ | $C_{12}$ | $C_{44}$ |
|-----------------------|----------|----------|----------|----------|
| $\text{Cu}_2\text{N}$ | 114.72   | 114.72   | 46.69    | 1.87     |

**Table S2.** The computed free energy changes of each possible elementary step during the electrochemical reduction of CO to CH<sub>4</sub> and C<sub>2</sub>H<sub>4</sub> on Cu<sub>2</sub>N monolayer.

| Elementary step                                                                                 | Free energy change ( $\Delta G$ ) |
|-------------------------------------------------------------------------------------------------|-----------------------------------|
| $\text{CO}_2 (\text{g}) + \text{H}^+ + \text{e}^- \rightarrow \text{*COOH}$                     | -0.03                             |
| $\text{CO}_2 (\text{g}) + \text{H}^+ + \text{e}^- \rightarrow \text{*HCOO}$                     | 0.62                              |
| $\text{*COOH} + \text{H}^+ + \text{e}^- \rightarrow \text{*CO} + \text{H}_2\text{O}$            | 0.12                              |
| $\text{*CO} \rightarrow \text{CO} + \text{*}$                                                   | 0.93                              |
| $\text{*COOH} + \text{H}^+ + \text{e}^- \rightarrow \text{*HCOOH}$                              | 1.45                              |
| $\text{*HCOH} \rightarrow \text{HCOH} + \text{*}$                                               | 1.23                              |
| $\text{*COOH} + \text{H}^+ + \text{e}^- \rightarrow \text{*COHOH}$                              | 0.97                              |
| $\text{*CO} + \text{H}^+ + \text{e}^- \rightarrow \text{*HCO}$                                  | -0.12                             |
| $\text{*CO} + \text{H}^+ + \text{e}^- \rightarrow \text{*COH}$                                  | 0.74                              |
| $\text{*HCO} + \text{H}^+ + \text{e}^- \rightarrow \text{*HCOH}$                                | 0.33                              |
| $\text{*HCO} + \text{H}^+ + \text{e}^- \rightarrow \text{*H}_2\text{CO}$                        | 1.14                              |
| $\text{*HCOH} + \text{H}^+ + \text{e}^- \rightarrow \text{*H}_2\text{COH}$                      | -0.12                             |
| $\text{*HCOH} + \text{H}^+ + \text{e}^- \rightarrow \text{*CH} + \text{H}_2\text{O}$            | 0.38                              |
| $\text{*H}_2\text{COH} + \text{H}^+ + \text{e}^- \rightarrow \text{*CH}_2 + \text{H}_2\text{O}$ | -0.32                             |
| $\text{*H}_2\text{COH} + \text{H}^+ + \text{e}^- \rightarrow \text{*H}_3\text{COH}$             | 0.45                              |
| $\text{*H}_3\text{COH} \rightarrow \text{H}_3\text{COH} + \text{*}$                             | 0.01                              |
| $\text{*CH}_2 + \text{H}^+ + \text{e}^- \rightarrow \text{*CH}_3$                               | -0.53                             |
| $\text{*CH}_3 + \text{H}^+ + \text{e}^- \rightarrow \text{CH}_4 + \text{*}$                     | -0.36                             |
| $\text{*CH}_2 + \text{CO} (\text{g}) + \text{e}^- \rightarrow \text{*CH}_2\text{-CO}$           | -0.33                             |

|                                                                                                              |       |
|--------------------------------------------------------------------------------------------------------------|-------|
| $*\text{CH}_2\text{-CO} + \text{H}^+ + \text{e}^- \rightarrow *\text{CH}_2\text{-COH}$                       | 0.13  |
| $*\text{CH}_2\text{-CO} + \text{H}^+ + \text{e}^- \rightarrow *\text{CH}_3\text{-CO}$                        | 0.25  |
| $*\text{CH}_2\text{-COH} + \text{H}^+ + \text{e}^- \rightarrow *\text{CH}_2\text{-CHOH}$                     | 0.20  |
| $*\text{CH}_2\text{-COH} + \text{H}^+ + \text{e}^- \rightarrow *\text{CH}_3\text{-COH}$                      | 0.79  |
| $*\text{CH}_2\text{-COH} + \text{H}^+ + \text{e}^- \rightarrow *\text{CH}_2\text{-COH}_2$                    | 1.24  |
| $*\text{CH}_2\text{-HCOH} + \text{H}^+ + \text{e}^- \rightarrow *\text{CH}_2\text{-HC} + \text{H}_2\text{O}$ | -0.46 |
| $*\text{CH}_2\text{-HCOH} + \text{H}^+ + \text{e}^- \rightarrow *\text{CH}_3\text{-HCOH}$                    | 0.92  |
| $*\text{CH}_2\text{-HCOH} + \text{H}^+ + \text{e}^- \rightarrow *\text{CH}_2\text{-H}_2\text{COH}$           | 0.58  |
| $*\text{CH}_2\text{-HC} + \text{H}^+ + \text{e}^- \rightarrow \text{CH}_2\text{H}_2 + *$                     | -0.41 |
| $*\text{CH}_2\text{-HC} + \text{H}^+ + \text{e}^- \rightarrow *\text{CH}_3\text{-HC}$                        | 0.23  |

**Table S3.** The computed free energy changes ( $\Delta G$  in eV) of  $\text{CO}_2$  to  $\text{COOH}^*$  and magnetic moment ( $M$  in  $\mu_B$ ) of TM and N sites within  $\text{TM}_2\text{N}$  monolayers (TM = Mn, Fe, Ni, Cu) monolayer.

| System                | $\Delta G$ on TM site | $\Delta G$ on N site | $M_{\text{TM}}$ | $M_{\text{N}}$ |
|-----------------------|-----------------------|----------------------|-----------------|----------------|
| $\text{Mn}_2\text{N}$ | -2.45                 | -1.79                | 2.78            | -0.18          |
| $\text{Fe}_2\text{N}$ | -1.13                 | -0.54                | 2.07            | -0.11          |
| $\text{Ni}_2\text{N}$ | +1.21                 | +0.76                | 0.00            | 0.00           |
| $\text{Cu}_2\text{N}$ | +1.45                 | -0.03                | 0.13            | 0.19           |

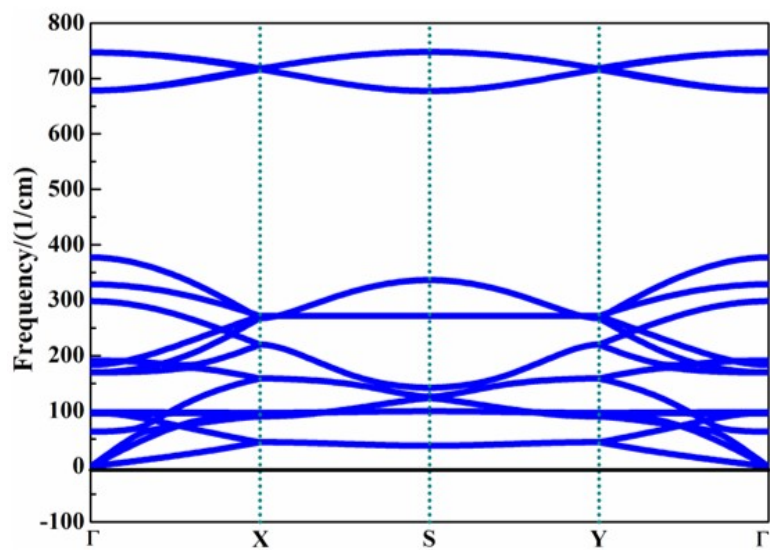

**Fig. S1.** The computed phonon dispersions of the predicted Cu<sub>2</sub>N monolayer.



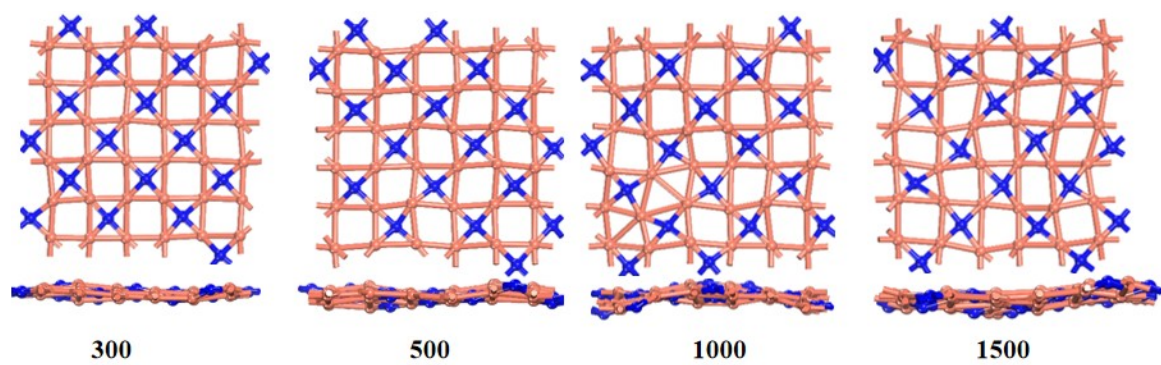

**Fig. S2.** Snapshots of Cu<sub>2</sub>N equilibrium structures at varieties temperatures after 10 ps AIMD simulations.

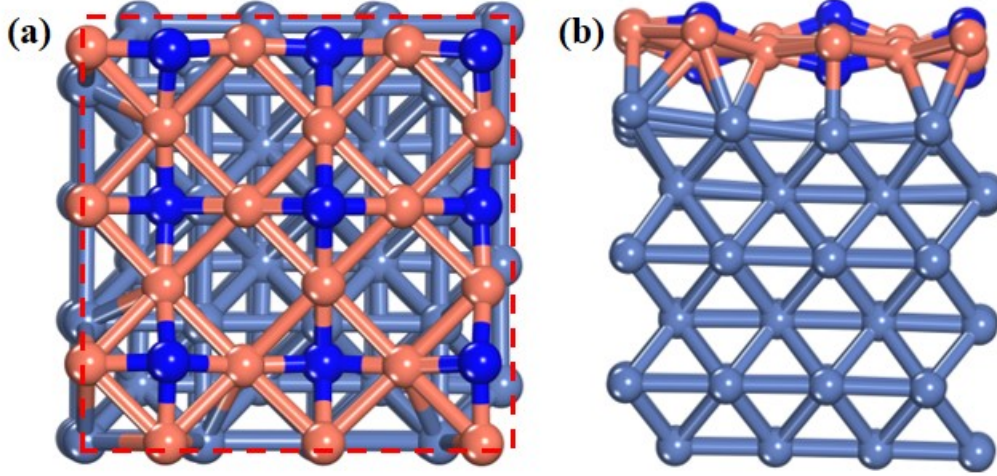

**Fig. S3.** (a) Top and (b) side views of the ball and stick model of the Cu<sub>2</sub>N/Cu(100). Cu(100) and the Cu and N atoms of Cu<sub>2</sub>N are denoted by blue gray, orange and blue spheres, respectively.

The formation energy ( $E_{form}$ ) of Cu<sub>2</sub>N monolayer on Cu(100) substrate was defined as:  $E_{form} = E_{Cu_2N/Cu(100)} - N \times E_{Cu} - M \times E_N - E_{Cu(100)}$ , where  $E_{Cu_2N/Cu(100)}$  is the total energy of Cu<sub>2</sub>N/Cu(100), N and M represent the number of Cu and N atoms in the Cu<sub>2</sub>N monolayer,  $E_{Cu}$  and  $E_N$  can be computed from Cu bulk and N<sub>2</sub> gas, and  $E_{Cu(100)}$  is the energy of Cu(100) substrate.

The cleavage energy ( $E_{cl}$ ) of the exfoliation of Cu<sub>2</sub>N monolayer from Cu(100) substrate was determined by:

$$E_{cl} = \frac{E_{Cu_2N} + E_{Cu(100)} - E_{Cu_2N/Cu(100)}}{A}$$

where  $E$  represents the electronic energies, where A is the interface area.

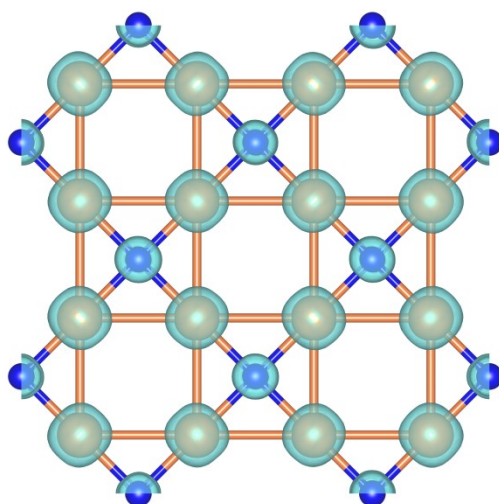

**Fig. S4.** Spin density of  $\text{Cu}_2\text{N}$  monolayer.

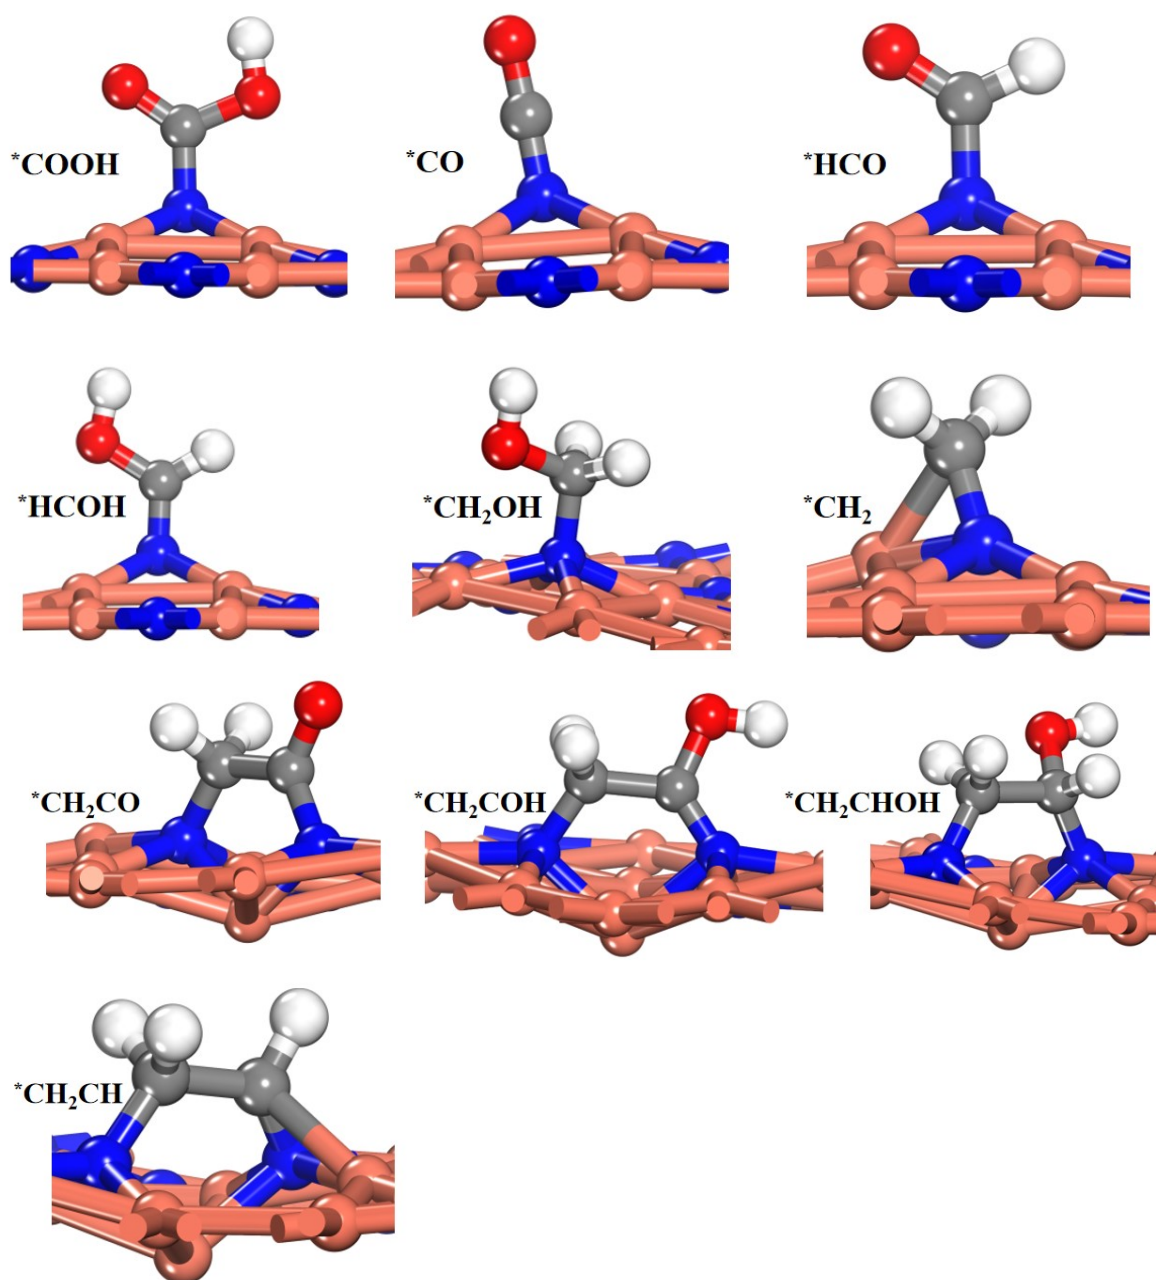

**Fig. S5.** The corresponding reaction intermediates of CO<sub>2</sub>RR on Cu<sub>2</sub>N monolayer along C<sub>1</sub> and C<sub>2</sub> pathways, where Cu, N, C, O, and H atoms are denoted by orange, blue, gray, red, and white balls, respectively.

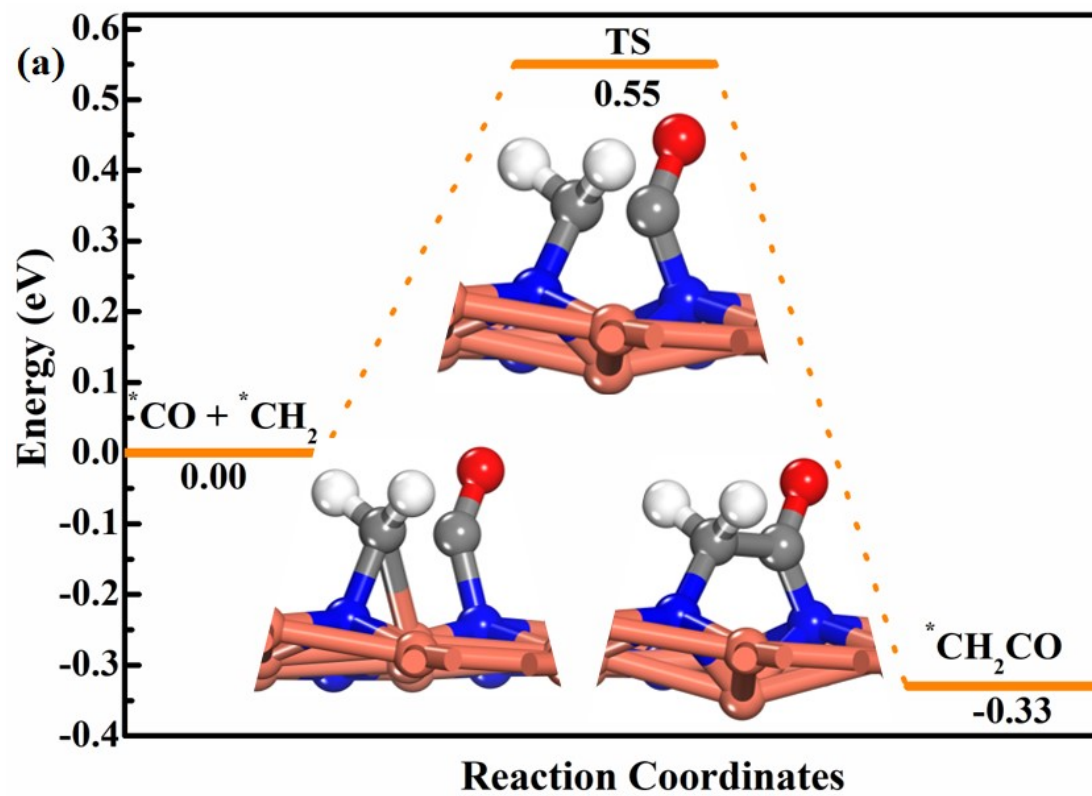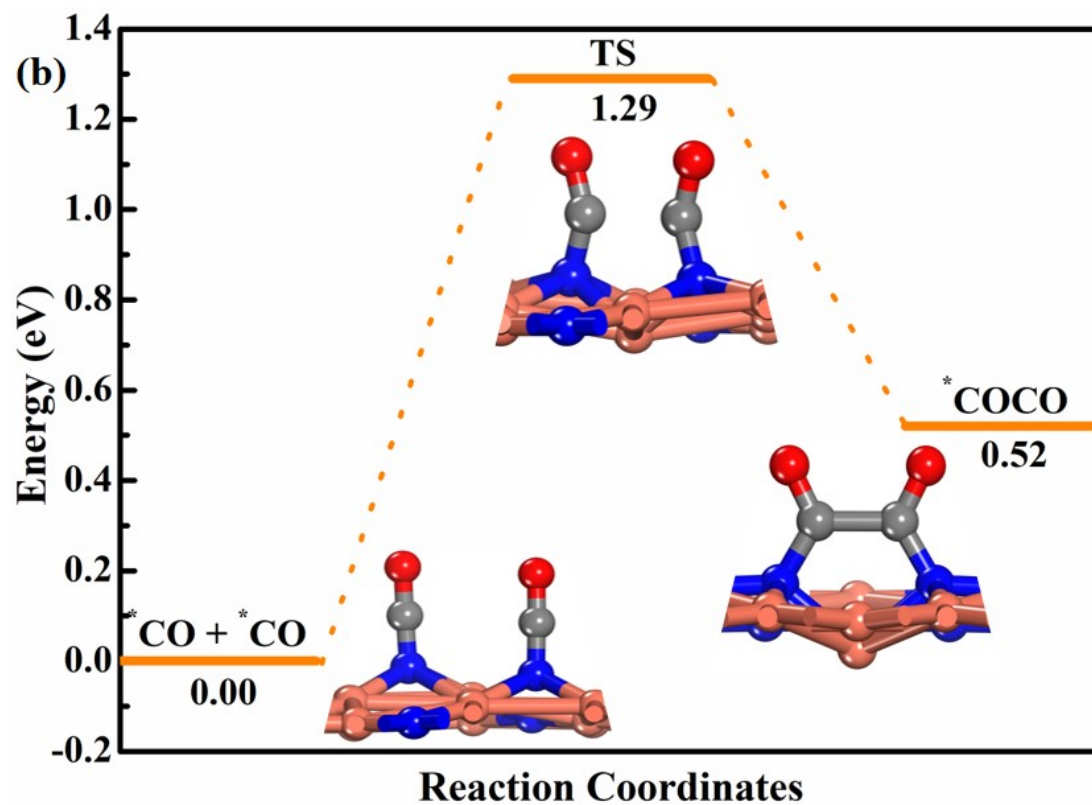

Fig. S6. The kinetic reaction pathway for C–C coupling along (a) carbene and (b) CO dimerization mechanisms. TS denotes the transition state.

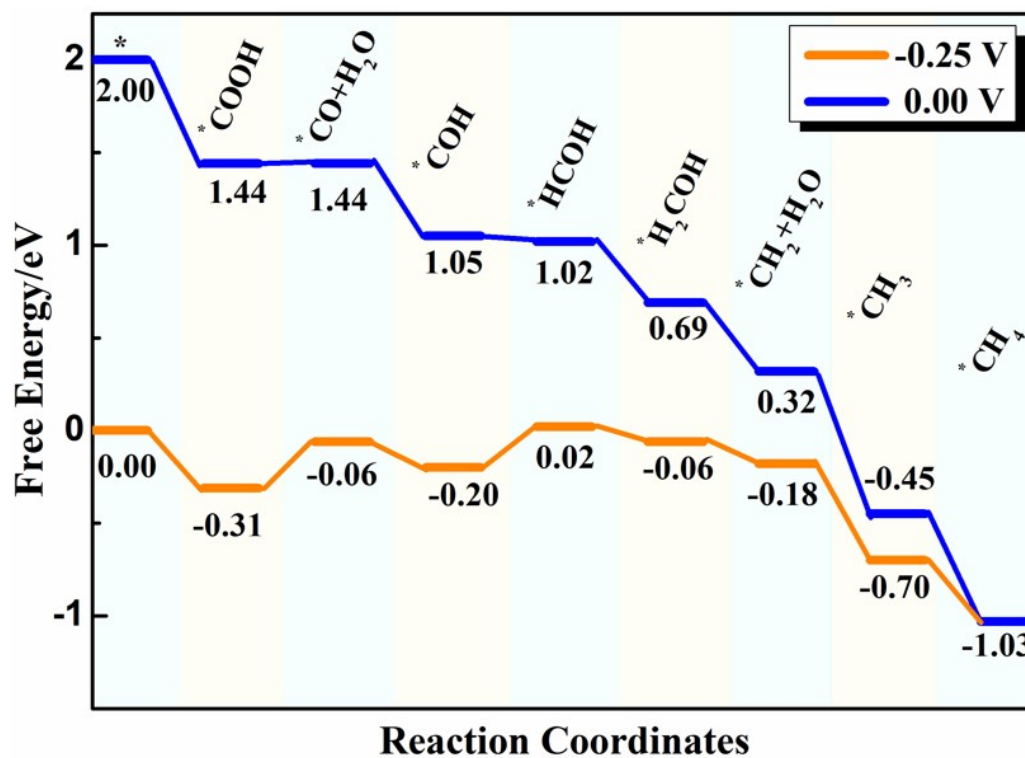

**Fig. S7.** The computed free energy profiles for the CO<sub>2</sub>RR on Cu<sub>2</sub>N monolayer along C<sub>1</sub> pathway with solvent effect.

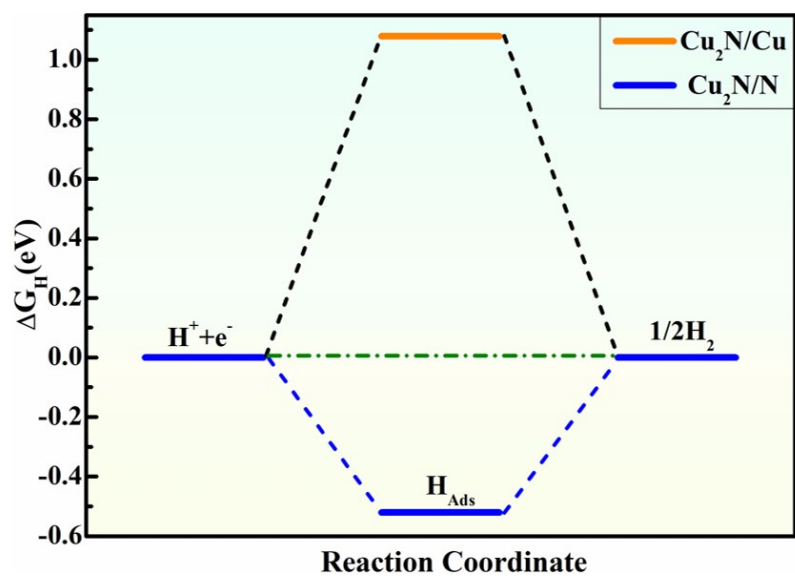

**Fig. S8.** The calculated Gibbs free profile of HER on various sites of  $\text{Cu}_2\text{N}$  monolayer.



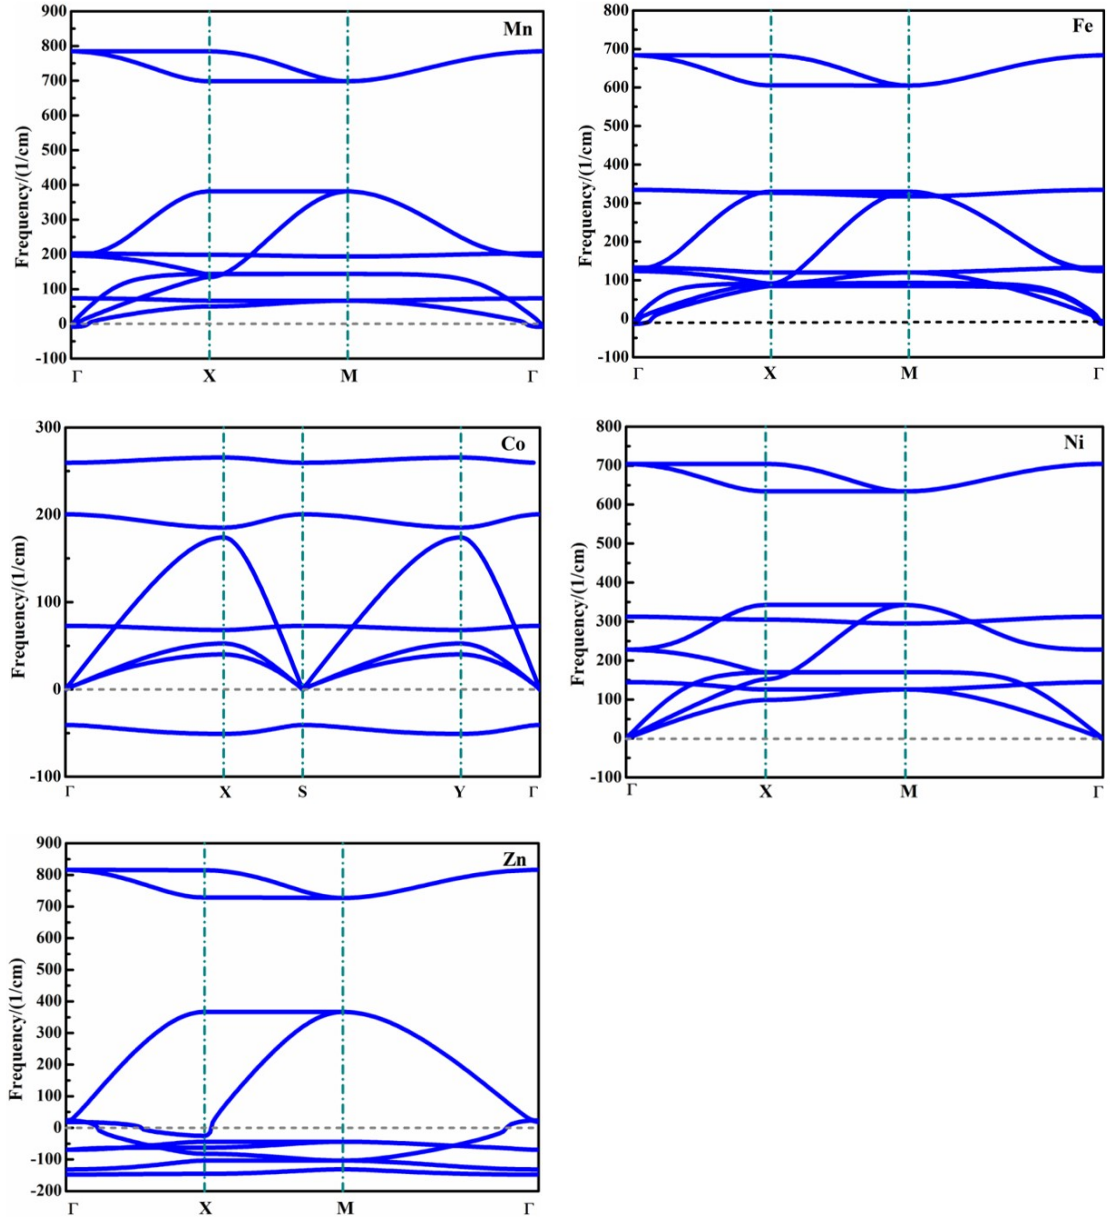

**Fig. S9.** The computed phonon dispersions of other predicted  $TM_2N$  (TM= Mn, Fe, Co, Ni, Zn) monolayers.



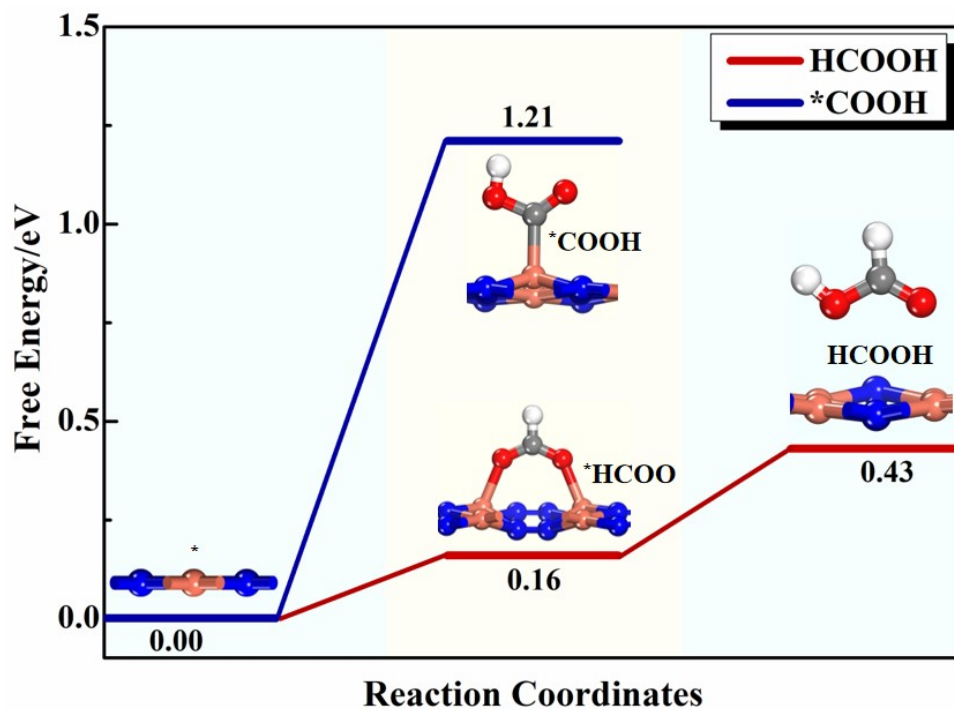

**Fig. S10.** The computed free energy profile and the corresponding intermediates for CO<sub>2</sub>RR on CuN<sub>2</sub> monolayer.
